# Supplementary material for: Comparing OMI-based and EPA AQS in situ NO 2 trends: towards understanding surface NO x emission changes
Source: Copernicus journal article supplement (doi:10.5194/amt-11-3955-2018), 2018-07-06
Supplement: Supplementary file 1 [file amt-11-3955-2018-supplement.pdf]

Supplement of Atmos. Meas. Tech., 11, 3955–3967, 2018  
<https://doi.org/10.5194/amt-11-3955-2018-supplement>  
© Author(s) 2018. This work is distributed under  
the Creative Commons Attribution 4.0 License.

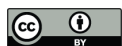

*Supplement of*

## **Comparing OMI-based and EPA AQS in situ NO<sub>2</sub> trends: towards understanding surface NO<sub>x</sub> emission changes**

**Ruixiong Zhang et al.**

*Correspondence to:* Yuhang Wang (yuhang.wang@eas.gatech.edu)

The copyright of individual parts of the supplement might differ from the CC BY 4.0 License.

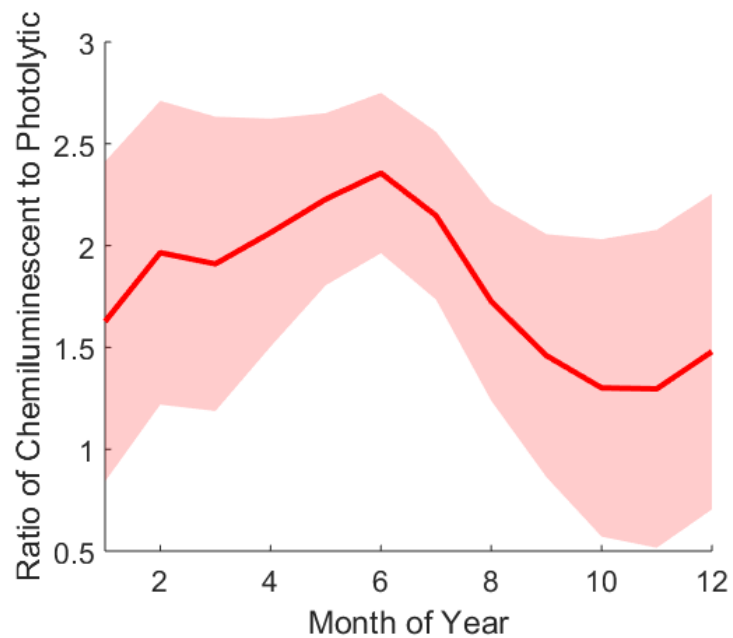

**Figure S1.** The ratios between surface  $\text{NO}_2$  concentrations of chemiluminescence to photolytic instruments. The ratios are calculated for each month from 7 sites with coincident photolytic measurements. The shaded area shows the 95<sup>th</sup> percentile confidence intervals.

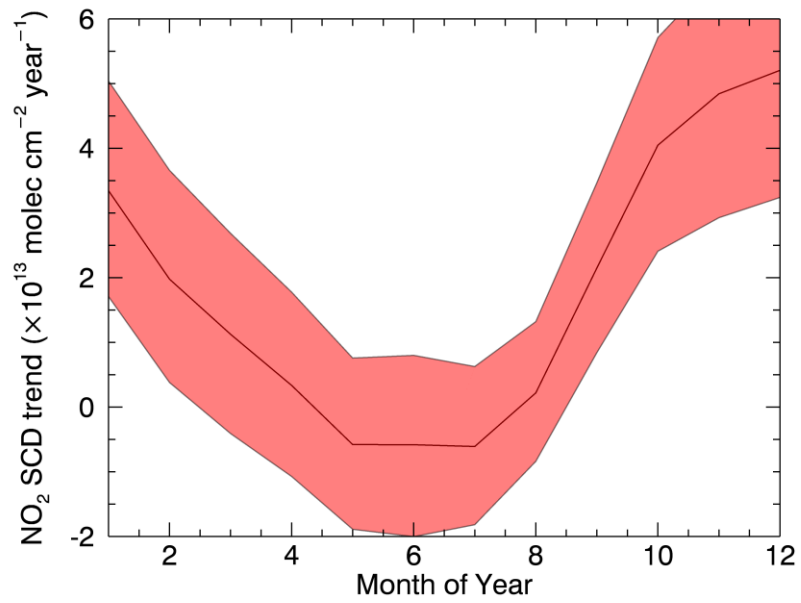

**Figure S2. The monthly OMI tropospheric NO<sub>2</sub> SCD trends averaged in the North Pacific region from 2005 to 2014. The red shade represents the 95<sup>th</sup> percentile confidence intervals.**

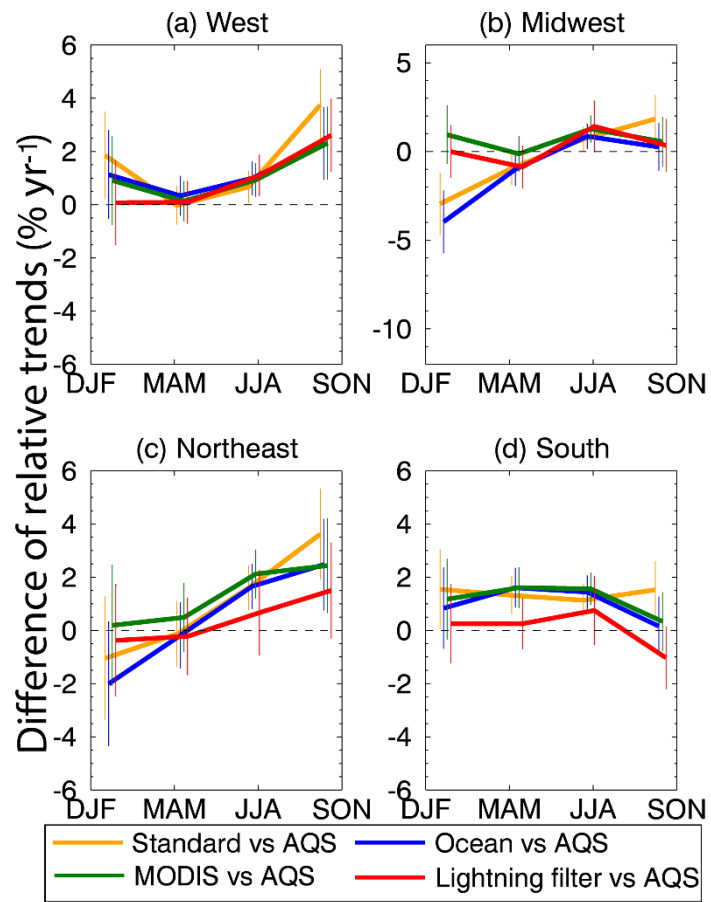

Figure S3. Seasonal differences of OMI-based relative trends from those computed from AQS in situ data. The error bars represent 95<sup>th</sup> percentile confidence intervals. Same as Figure 7 in the main text but using monthly correction for ocean trend removal.

5

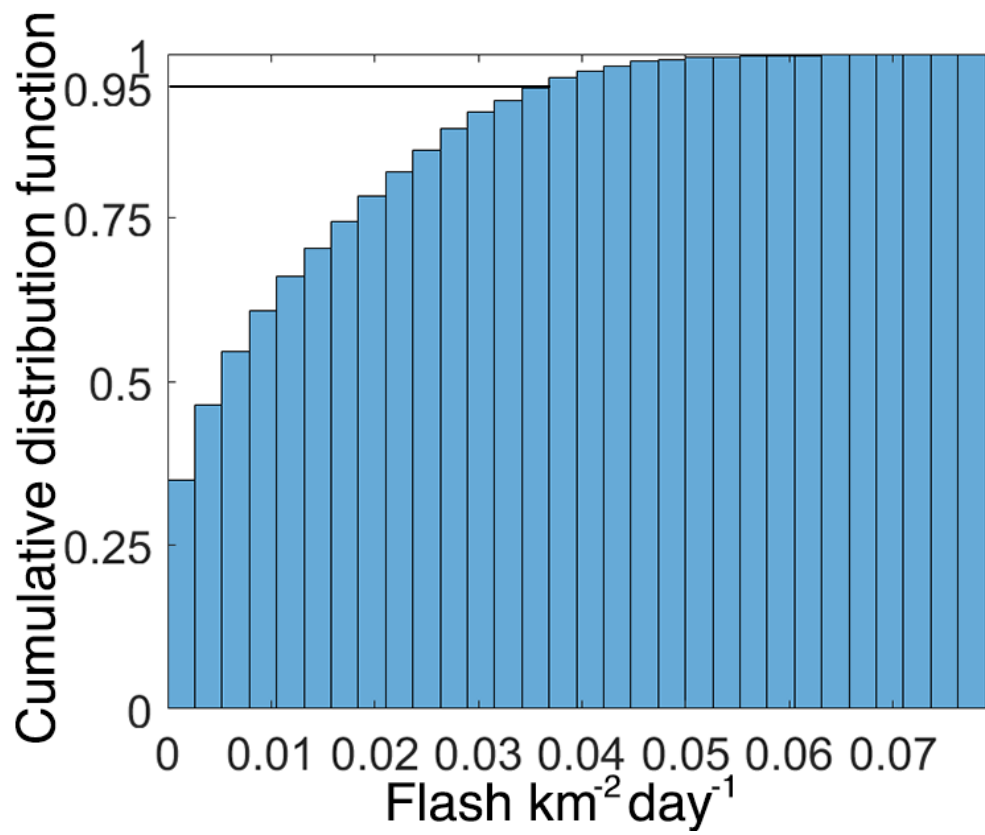

Figure S4. The cumulative distribution function of NLDN detected CG lightning density in the South.
